# Supplementary material
Source: PubMed Central journal article supplement (PMC5101445)
Supplement: cmi201564x1.pdf [file cmi201564x1.pdf]

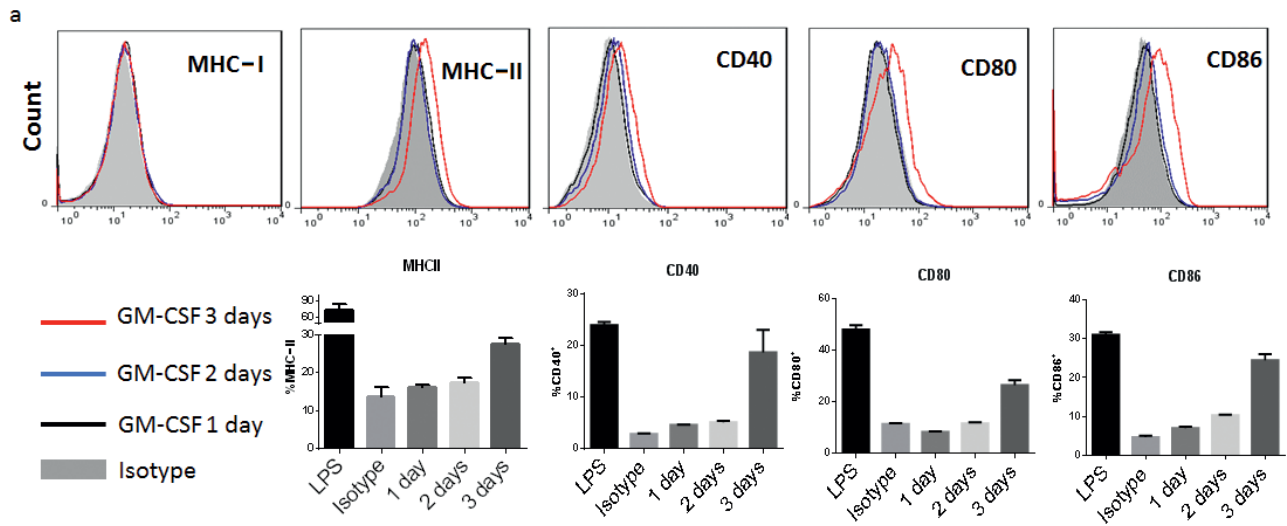

**Figure S1** Continuous GM-CSF stimulation has a cumulative effect on dendritic cells *in vitro*. **(a)** The dendritic cell line DC2.4 in culture was treated with GM-CSF for one, two, and three days. The cells were immunostained for MHC-II, CD40, CD80, and CD86 and analyzed by FACS. Shown is one of the three independent experiments with similar results.

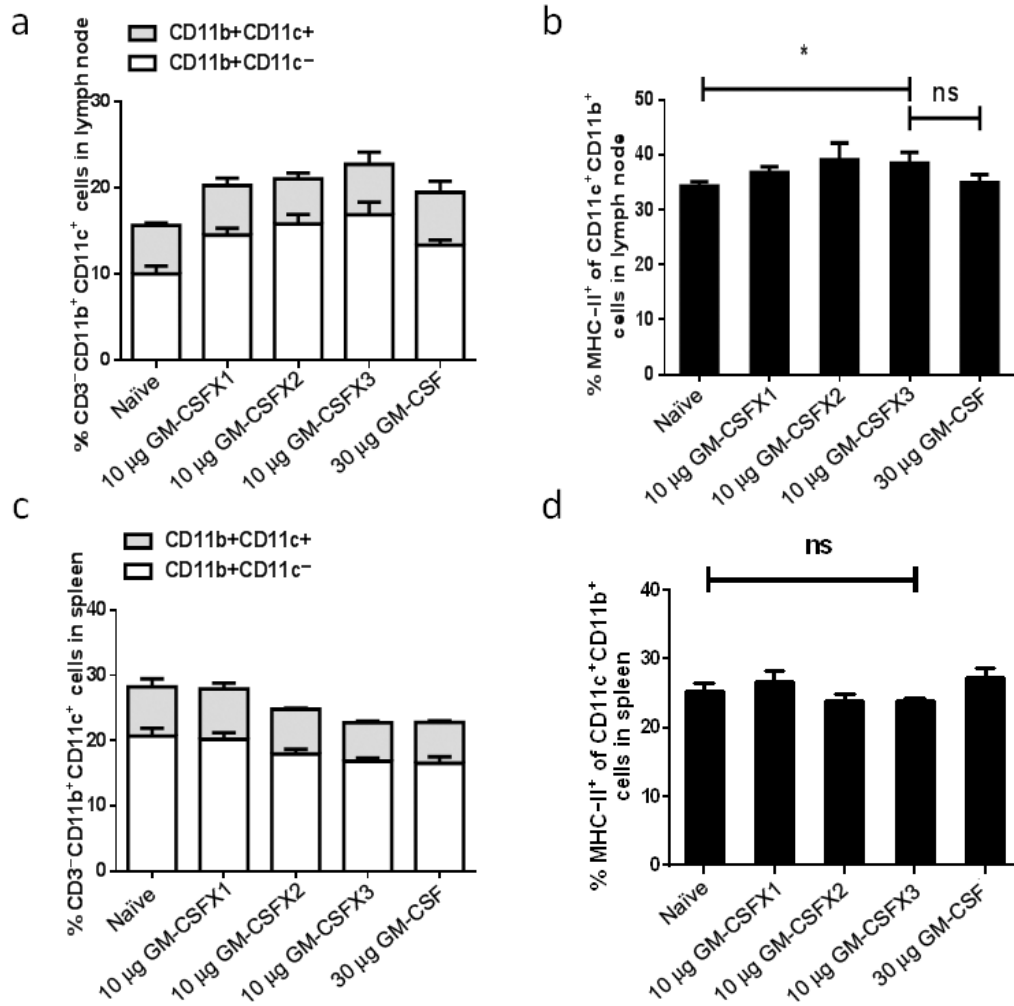

**Figure S2** The effects of continuous GM-CSF stimulation on dendritic cells in lymph nodes (**a, b**) and spleens (**c, d**). Mice were subcutaneously injected with 10 $\mu$ g of GM-CSF for one, two, and three days or with 30 $\mu$ g of GM-CSF for one day. Spleen and lymph node cells were isolated on day 4, and FACS analysis was performed to determine the percentage of cells with a myeloid DC phenotype (stained with CD11c-FITC, CD11b-PB, and MHC-II-PE). The percentage of double-stained cells identified is shown. Results are from a single representative experiment (\* $p < 0.05$ , \*\* $p < 0.01$ )

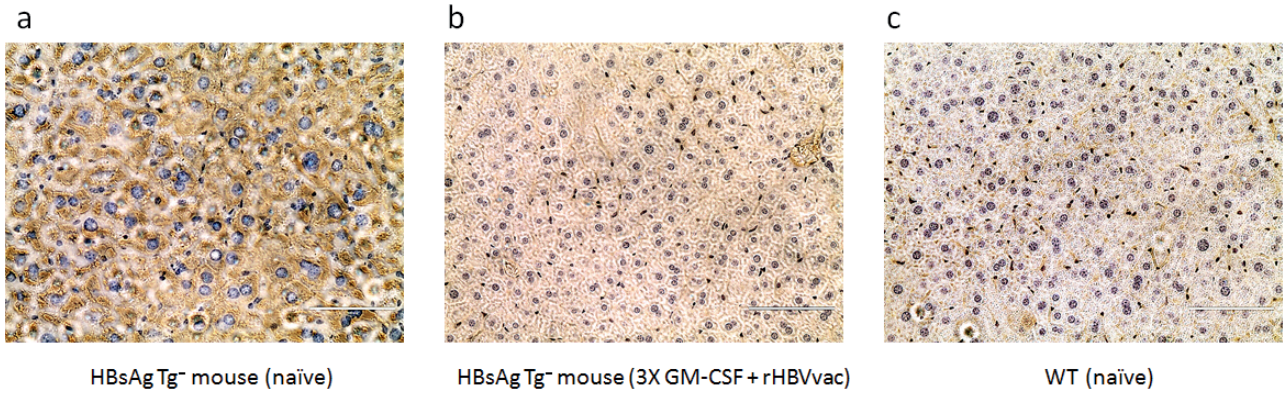

**Figure S3** Specific immunostaining of HBsAg in HBV transgenic mice and wild-type (WT) mice at 14 days after the third immunization. Liver sections were examined after specific immunostaining of HBsAg. Objective amplification from left to right is 400 $\times$ . **(a)** Liver of naïve HBsAg-Tg mice. **(b)** Liver from the 3 $\times$ GM-CSF+rHBVvac group after the third immunization. **(c)** Liver of naïve WT mice (C57BL/6). Data are expressed as mean  $\pm$  SEM ( $n = 5$ ) (\*\* $p < 0.001$ ).
